# Supplementary material for: Interfacial Characterization of Polypyrrole/AuNP Composites towards Electrocatalysis of Ascorbic Acid Oxidation
Source: MDPI journal article supplement (doi:10.3390/molecules27185776), 2022-09-07
Supplement: s1 [file s1]

## Supplementary Information

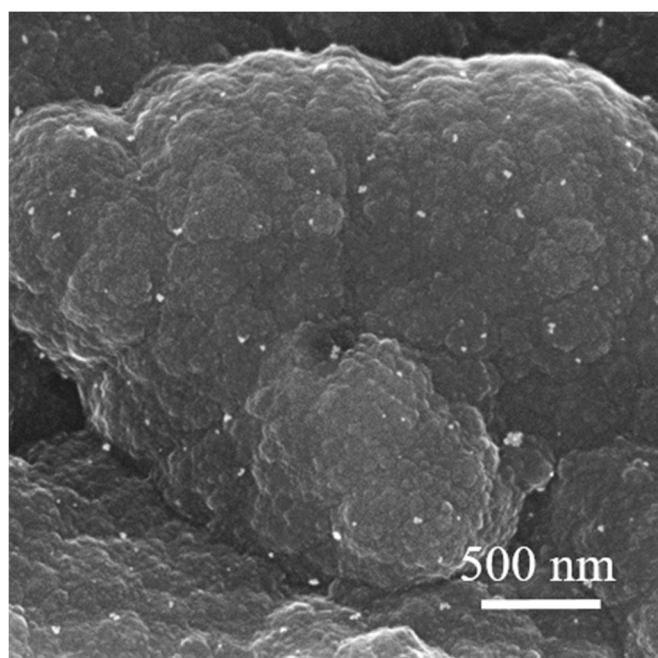

Figure S1 - Representative SEM images of modified electrode PPy/AuNPs 5s.

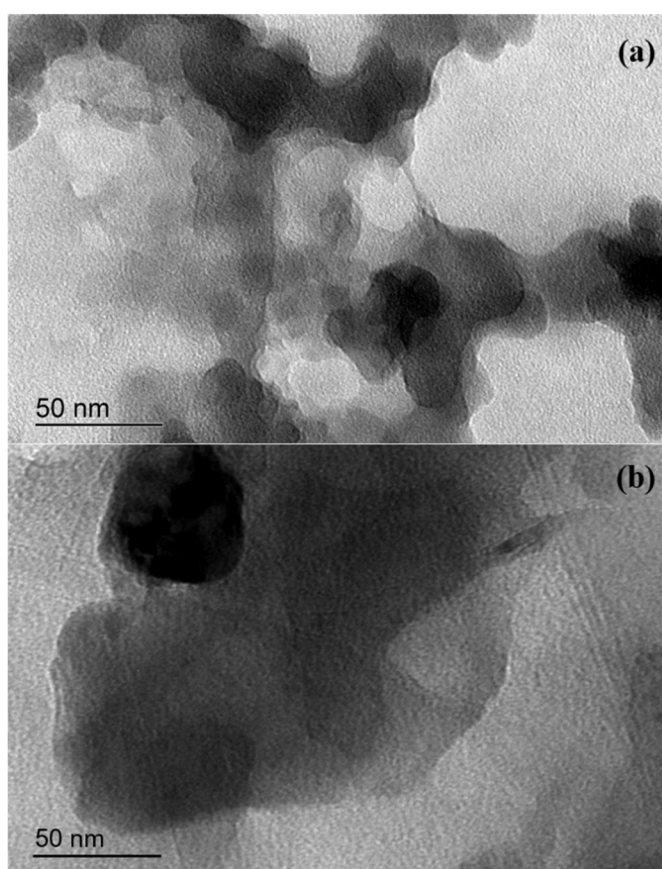

Figure S2 - Representative bright-field TEM images of (a) PPy/AuNPs 30s, and (b) PPy/AuNPs 45s.

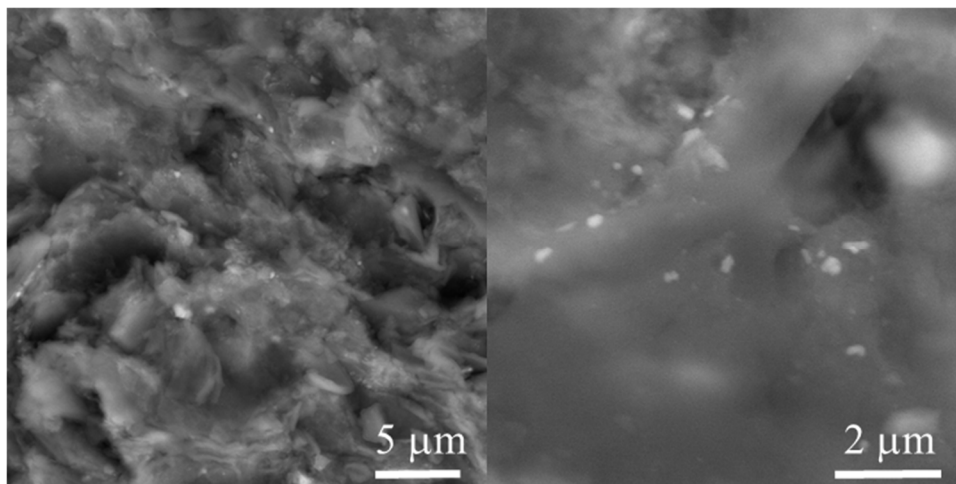

Figure S3 - Representative SEM images of PPy/AuNPs 15s after AA oxidation (a) 10.000x and (b) 30.000x of magnification.

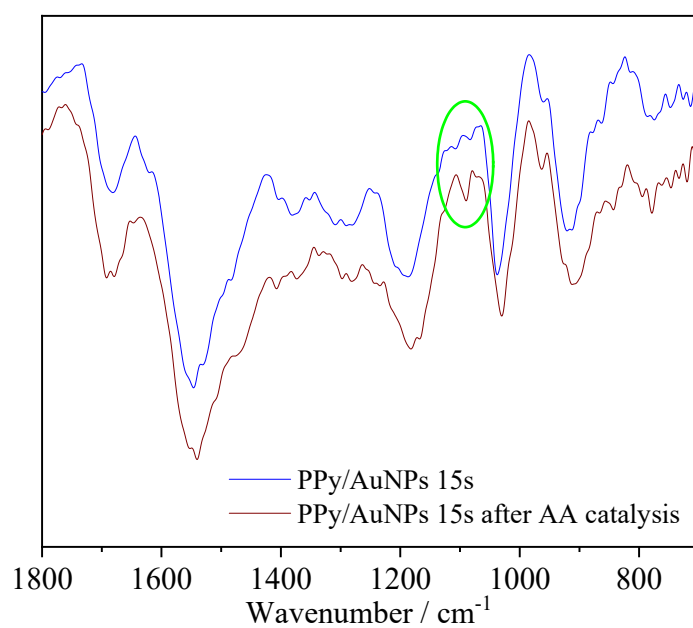

Figure S4. FTIR spectra of PPy/AuNPs 15s before (blue line) and after (brown line) the AA electrocatalysis.

Table S1. Uncertainty values of the fitted parameters obtained by fitting EIS.

| Electrode        | Rs/% | Rct/% | Qdl/% | ndl/% | rpol/% | qlf/% | nlf/% |
|------------------|------|-------|-------|-------|--------|-------|-------|
| PPy              | 0.44 | 1.66  | 4.97  | 1.05  | 9.01   | 0.21  | 0.20  |
| PPy/AuNPs<br>15s | 0.51 | 4.39  | 6.53  | 1.79  | 7.47   | 0.18  | 0.19  |
| PPy/AuNPs<br>30s | 0.44 | 1.18  | 4.84  | 0.99  | 4.84   | 0.17  | 0.15  |
| PPy/AuNPs<br>45s | 1.16 | 7.86  | 9.09  | 2.07  | 5.08   | 0.69  | 0.69  |
